# Aciculatin Induces p53-Dependent Apoptosis via MDM2 Depletion in Human Cancer Cells *In Vitro* and *In Vivo*

Chin-Yu Lai<sup>1</sup>, An-Chi Tsai<sup>2</sup>, Mei-Chuan Chen<sup>1</sup>, Li-Hsun Chang<sup>1</sup>, Hui-Lung Sun<sup>1</sup>, Ya-Ling Chang<sup>1</sup>, Chien-Chih Chen<sup>3</sup>, Che-Ming Teng<sup>1\*</sup>, Shioh-Lin Pan<sup>2\*</sup>

**1** Pharmacological Institute, College of Medicine, National Taiwan University, Taipei, Taiwan, **2** Institute of Biotechnology and Pharmaceutical Research, National Health Research Institutes, Zhunan Town, Taiwan, **3** Department of Biotechnology, Hungkuang University, Taichung, Taiwan

## Abstract

Aciculatin, a natural compound extracted from the medicinal herb *Chrysopogon aciculatus*, shows potent anti-cancer potency. This study is the first to prove that aciculatin induces cell death in human cancer cells and HCT116 mouse xenografts due to G1 arrest and subsequent apoptosis. The primary reason for cell cycle arrest and cell death was p53 accumulation followed by increased p21 level, dephosphorylation of Rb protein, PUMA expression, and induction of apoptotic signals such as cleavage of caspase-9, caspase-3, and PARP. We demonstrated that p53 allele-null (−/−) (p53-KO) HCT116 cells were more resistant to aciculatin than cells with wild-type p53 (+/+). The same result was achieved by knocking down p53 with siRNA in p53 wild-type cells, indicating that p53 plays a crucial role in aciculatin-induced apoptosis. Although DNA damage is the most common event leading to p53 activation, we found only weak evidence of DNA damage after aciculatin treatment. Interestingly, the aciculatin-induced downregulation of MDM2, an important negative regulator of p53, contributed to p53 accumulation. The anti-cancer activity and importance of p53 after aciculatin treatment were also confirmed in the HCT116 xenograft models. Collectively, these results indicate that aciculatin treatment induces cell cycle arrest and apoptosis via inhibition of MDM2 expression, thereby inducing p53 accumulation without significant DNA damage and genome toxicity.

**Citation:** Lai C-Y, Tsai A-C, Chen M-C, Chang L-H, Sun H-L, et al. (2012) Aciculatin Induces p53-Dependent Apoptosis via MDM2 Depletion in Human Cancer Cells *In Vitro* and *In Vivo*. PLoS ONE 7(8): e42192. doi:10.1371/journal.pone.0042192

**Editor:** Marie-Josée Boucher, University of Sherbrooke, Canada

**Received:** January 26, 2012; **Accepted:** July 4, 2012; **Published:** August 13, 2012

**Copyright:** © 2012 Lai et al. This is an open-access article distributed under the terms of the Creative Commons Attribution License, which permits unrestricted use, distribution, and reproduction in any medium, provided the original author and source are credited.

**Funding:** This work was supported by the National Science Council of the Republic of China (NSC 99-2628-B-002-024-MY3 and NSC 99-2320-B-400-008-MY3)(<http://web1.nsc.gov.tw/>). The funders had no role in study design, data collection and analysis, decision to publish, or preparation of the manuscript.

**Competing Interests:** The authors have declared that no competing interests exist.

\* E-mail: cmteng@ntu.edu.tw (CMT); apan0826@nhri.org.tw (SLP)

† These authors contributed equally to this work.

## Introduction

Discovery and development of anti-cancer drugs is an endless challenge for biochemists and pharmacologists worldwide. Natural products are abundant sources of novel and cytotoxic structures that have the potential to be promising lead compounds for antineoplastic drugs.

Aciculatin is a natural compound isolated from the medicinal herb, *Chrysopogon aciculatus*, which is widely used for the treatment of swellings, common cold, fever, and diarrhea. Aciculatin was first reported in 1991 showing DNA-binding activity and cytotoxicity *in vitro* [1,2]. A recent study demonstrated that aciculatin exerts dual inhibitory effects on inducible nitric oxide synthase (iNOS) and cyclooxygenase-2 (COX-2) due to regulation of the NF-kappaB and c-Jun N-terminal kinase (JNK)/p38 pathways [3]. However, the exact mechanism by which aciculatin exerts its tumor inhibitory effect remains unclear.

Tumor suppressor p53 plays a crucial role in arousing response to cellular stresses such as hypoxia, DNA damage, and oncogene activation. In normal circumstances, p53 is rapidly degraded by the E3-ubiquitin ligase murine double minute 2 (MDM2); the half-life of p53 is thus short and its protein level is difficult to detect [4]. Once cells are exposed to the aforementioned stresses, p53 degradation is turned off. Accumulated p53 then forms tetramers

and binds to specific DNA domains, leading to transcriptional regulation of genes. The most common effects are DNA repair, cell cycle arrest, senescence, and apoptosis. The downstream cellular responses of p53 could suppress uncontrolled growth, and if necessary, eliminate damaged cells [5]. This strategy has been used in current cancer therapies to induce p53-dependent apoptosis using, for example, DNA damage agents. However, the side effects of this treatment are severe due to genotoxicity. Moreover, even though nearly 50% of human cancers have wild-type p53, some up-regulated pathways block p53 function such as p14ARF deficiency and MDM2 amplification [6]. Therefore, agents that can induce or restore wild-type p53 function and correct the abnormal pathway with lower side effects are ideal candidates for novel anti-cancer drugs [7,8].

MDM2 oncoprotein is an E3 ubiquitin ligase that controls the p53 level in cells. MDM2 is a negative regulator mediating the ubiquitin degradation of p53; MDM2 also inhibits the transcriptional activity of p53 and facilitates its nuclear export [9]. Overexpression of MDM2 which impairs p53 function has been found in many human tumors. Moreover, MDM2 interacts with various tumor suppressor proteins including Rb, p21, p19/14<sup>ARF</sup>, E2F1, p73 and MTBP [10,11,12,13,14].

In this study, we aimed to identify the anti-tumor mechanism of aciculatin with *in vitro* and *in vivo* experiments using HCT116

human colorectal cancer cells. The results provide evidence of the importance of p53 and its downstream targets in aciculin-induced cell cycle arrest and caspase-dependent apoptosis. The effects of aciculin on MDM2 reduction and related p53 accumulation are also described. Same results were also confirmed using A549, a p53 wild-type non-small cell lung cancer cell line. Collectively, these findings suggest that aciculin is a promising natural product for anticancer therapy.

## Materials and Methods

### Materials

Aciculin was extracted and purified from *Chrysopogon aciculatus* by Professor C.C. Chen, Department of Biotechnology, Hungkuang University, Taiwan, with purity over 98%. RPMI 1640, fetal bovine serum (FBS), penicillin, streptomycin, and all other tissue culture reagents were obtained from Life Technologies (Grand Island, NY, USA). Enhanced chemiluminescence detection kit was from Amersham. Trizol reagent was from Invitrogen (Carlsbad, CA, USA); random primer and M-MLV RT were purchased from Promega (Madison, WI, USA); pro-Taq was from Protech (Taipei, Taiwan). HRP polymer conjugate reagent SuperPictureTM was from ZYMED LABORATORIES INC. (San Francisco, CA, USA); Nucleolin antibody, propidium iodide (PI), 3-(4, 5-dimethylthiazol-2-yl)-2,5-diphenyltetrazolium bromide, sulforhodamine B, and all of the other chemical reagents were obtained from Sigma Chemical (St. Louis, MO, USA).

### Cell culture

The human colorectal cancer cell line HCT116 and human non-small cell lung cancer cell line A549 were purchased from American Type Culture Collection (ATCC; Manassas, VA, USA). p53-KO (p53 knockout) HCT116 cells were kindly provided by Dr. B. Vogelstein (Johns Hopkins). Both were cultured in RPMI 1640 with 10% heat-inactivated fetal bovine serum (v/v) and penicillin (100 units/mL)/streptomycin (100 µg/mL). Cells were maintained in a humidified incubator at 37°C in 5% CO<sub>2</sub>/95% air.

### MTT assay

Cells were incubated with vehicle (0.1% DMSO) or compounds for 48 h. Washed once and incubated with 0.5 mg/mL 3-(4,5-dimethylthiazol-2-yl)-2,5-diphenyltetrazolium bromide at 37°C for 1 h. After the incubation, cells were lysed with DMSO and the absorbance was obtained using an ELISA reader (550 nm). Results were calculated as: cell viability (%) = average O.D. of wells/average O.D. of control wells.

### FACScan flow cytometry

After the treatment of vehicle (0.1% DMSO) or compounds for the indicated time courses, cells were harvested by trypsinization, for cell cycle analysis, cells were fixed with 70% (v/v) alcohol at 4°C overnight. After centrifugation, cells were incubated in 0.1 mol/L phosphate-citric acid buffer [0.2 mol/L NaHPO<sub>4</sub>, 0.1 mol/L citric acid (pH 7.8)] for 20 min at room temperature. Then, cells were centrifuged and resuspended with 0.5 mL PI solution containing Triton X-100 (0.1%, v/v), RNase (100 µg/mL), and PI (80 µg/mL). DNA content was analyzed with the FACScan and CellQuest software (Becton Dickinson). For annexin V-FITC and PI double staining, the FITC Annexin V Apoptosis Detection Kit (BD Biosciences; San Jose, CA, USA) was performed. Cells were centrifuged and incubated with these reagents immediately. After incubation for 15 min, the fluores-

cently labeled cells were then analyzed with the FACScan and CellQuest software.

### TUNEL

Cells seeded in 8-well slide chambers were starved overnight and treated with vehicle (0.1% DMSO) or aciculin for 24 h. Cells and the tumor tissue slices were fixed in 4% paraformaldehyde and washed twice with PBS. The apoptotic cells were identified *in situ* using terminal deoxynucleotidyl transferase to transfer biotin-deoxyuridine triphosphatase (TUNEL, Roche Diagnostics, Mannheim, Germany) to the free 3'-OH of cleaved DNA. Cleavage sites were labeled by Biotin and visualized by reaction with fluorescein conjugated avidin (avidin-fluorescein isothiocyanate). Photomicrographs were obtained by Leica TCS SP2 confocal spectral microscope.

### Western blot analysis

Western blotting for total cell lysate and nuclear extraction were done as previously reported [15,16] with anti-p53, anti-pRb and anti-caspase-8 (BD Biosciences; San Jose, CA, USA); anti- $\alpha$ -tubulin, anti-actin, anti-p21, anti-p27, anti-poly(ADP-ribose) polymerase, anti-phosphorylated H2AX (Ser139), anti-MDM2, anti-PUMA, HRP-conjugated anti-mouse, and anti-rabbit IgG (Santa Cruz Biotechnology; Santa Cruz, CA, USA); anti-caspase-3 (Imgenex; San Diego, CA, USA); anti-caspase-9 and phosphoserine-15-p53 (Cell Signaling Technology; Beverly, MA, USA).

### RNA extraction and reverse transcription-polymerase chain reaction(RT-PCR)

Total RNA was extracted with Trizol reagent by the manufacturer's protocol (Invitrogen, Carlsbad, CA, USA). Reverse transcription was performed with 5 µg mRNA and random primer at 65°C for 5 min, then mixed with Moloney murine leukemia virus reverse transcriptase (RT) to react at 37°C for 1 h to obtain cDNA. Gene amplification was followed with RT-polymerase chain reaction (PCR). The primer sequences used for amplification were as follows: GAPDH, 5'-TCCTTGGAGGC-CATGTGGCCAT-3'/5'-T GATGACATCAAGAAGGTGG-TGAAG-3'; p53, 5'-CAGCCAAGTCTGTGACTTGCACGTA-C-3'/5'-CTATGTCGAAAAGTGTCTTCTGTCATC-3'; MDM2, 5'-GGGAGATATGTTGTGAAAGAAGC3'-5'-CCCTG-CCTGATACACAGTAACTT. Standard amplification parameters were used with the following processes: For p53, 94°C for 3 min, 35 cycles with denaturation at 94°C for 30 s, annealing at 60°C for 45 s, and extension at 72°C for 1 min, at last, 72°C for 10 min. For GAPDH and MDM2, 95°C for 10 min; 35 cycles (MDM2: 40 cycles) with denaturation at 95°C for 15 s, annealing at 60°C for 5 s, and extension at 72°C for 12 s; followed by a final extension at 75°C for 15 s. PCR products were analyzed on 1.5% agarose gel in the presence of 1 µg/mL of ethidium bromide.

### Transient transfection

HCT116 cells were seeded in 3.5-cm dishes overnight, and then transfected with TP53 siRNA or MDM2 plasmid using Lipofectamine 2000 according to the manufacturer's protocol. TP53 siRNA and lipofectamine 2000 are from Invitrogen (Carlsbad, CA, USA) and MDM2 plasmid (No. 16233) is from Addgene (Cambridge, MA, USA). After 6 h transfection and re-serum, cells were starved and then treated with vehicle (0.1% DMSO) or aciculin for the indicated times. Cell lysates were collected for Western blot analysis.

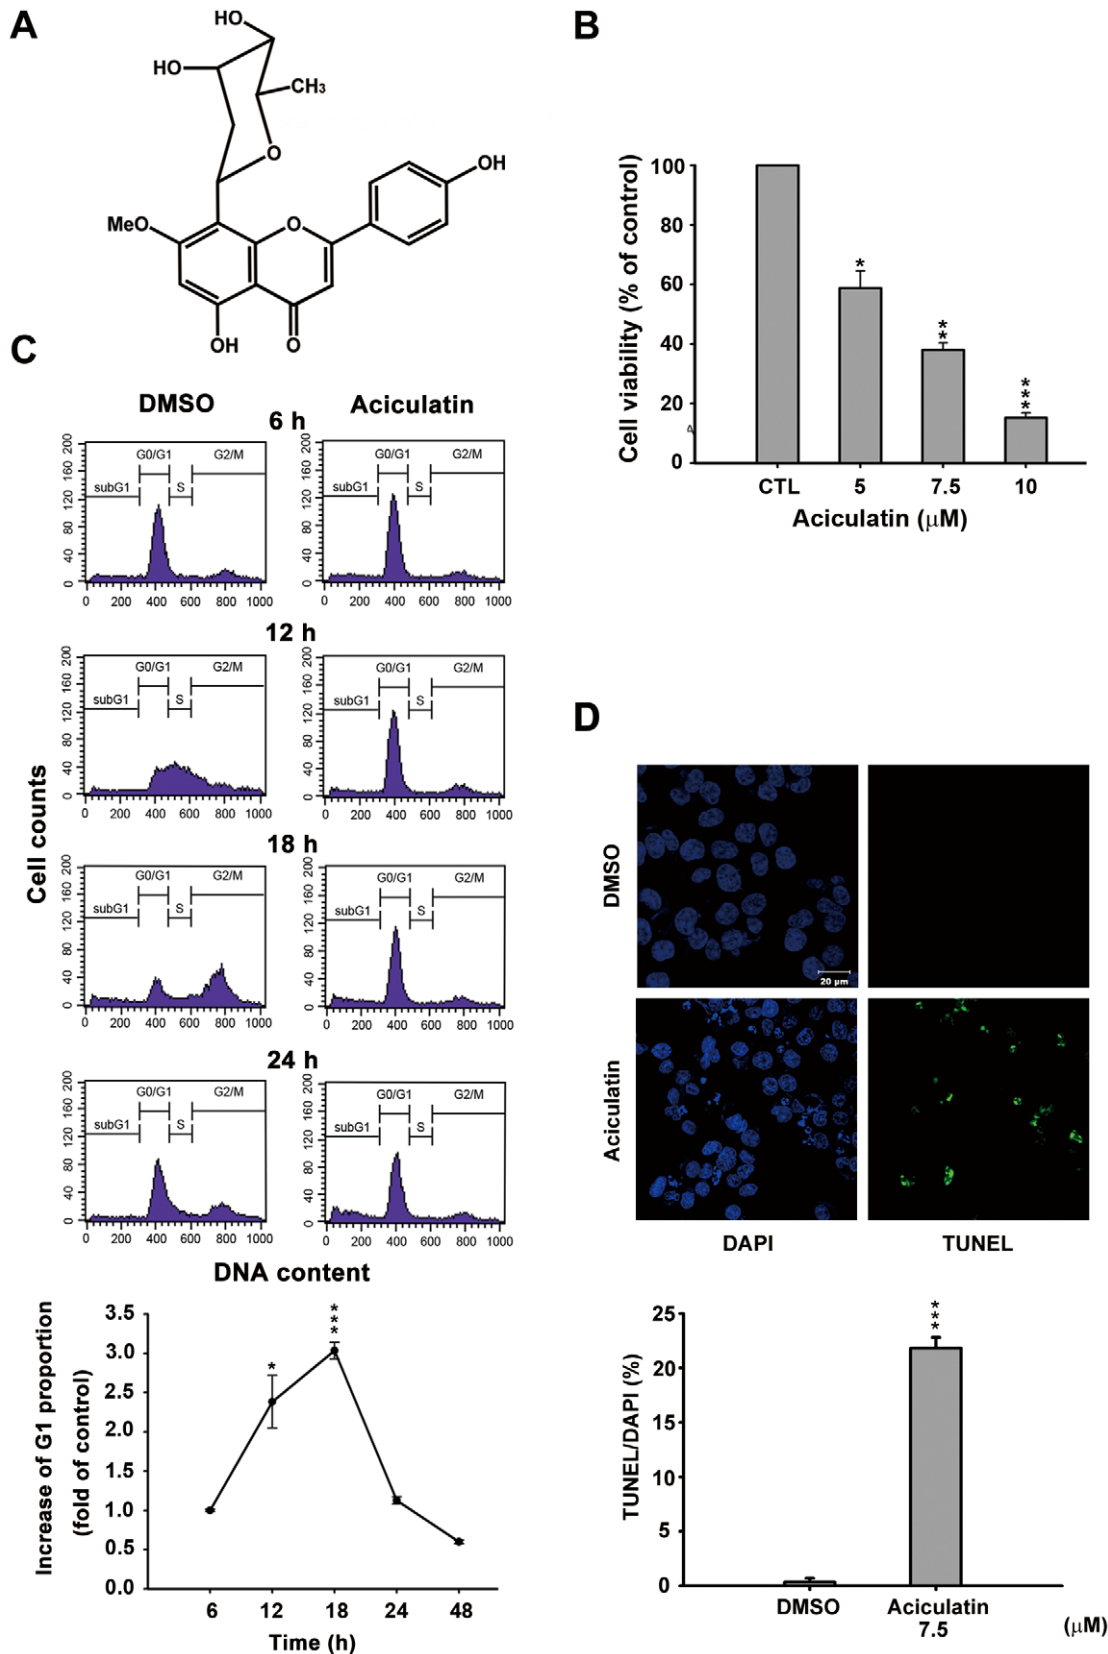

**Figure 1. Effect of aciculatin on cell viability and cell cycle in human cancer cells.** A, Structure of aciculatin: 8-(2,6-dideoxy-β-ribohexopyranosyl)-5-hydroxy-2-(4-hydroxyphenyl)-7-methoxy-4H-1-benzopyran-4-one sesquihydrate. B, HCT116 cells were incubated with the indicated concentrations of aciculatin (5–10 μM) for 48 h. Cell viability was then determined by MTT assay. C, HCT116 cells were starved overnight, and then incubated with vehicle (0.1% DMSO) or aciculatin (10 μM) for the indicated period. The DNA content was subsequently analyzed by PI staining using

a FACScan flow cytometric assay. The curve chart shows that aciculin increased the G1 population of cells in a time-dependent manner. Mean  $\pm$  SE values from 3 independent experiments. \* $P < 0.05$  and \*\*\* $P < 0.001$ , compared with non-treated cells. D, HCT116 cells were treated with vehicle (0.1% DMSO) or aciculin (7.5  $\mu$ M) and then double stained with TUNEL and DAPI. Increased green fluorescence indicated that the cells underwent apoptosis after aciculin treatment (TUNEL, right panel). The nuclei were stained with DAPI (left panel). The bar chart shows the proportions of TUNEL positive cells in each treatment normalized to DAPI. \*\*\* $P < 0.001$ . doi:10.1371/journal.pone.0042192.g001

**Immunohistochemistry analysis**

The formalin-fixed paraffin-embedded (FFPE) tumor tissue slices were deparaffinized in xylene and rehydrated in a graded series of ethanol. Submerge tissue slices with 3% hydrogen peroxide to quench endogenous peroxidase activity. To unmask antigen, tissue slices were heated in 95°C Tris-EDTA Buffer

(10 mM Tris Base, 1 mM EDTA Solution, 0.05% Tween 20, pH 9.0) for 30 min. Slices were blocked with 4% nonfat milk for 40 min and incubated with indicated antibody for 1 h at room temperature. HRP polymer conjugate reagent A (SuperPicture™) were applied to the slices and reagent B for subsequently peroxidase catalyzed reaction which visualizes the location of the antigen. Mayer's Hematoxylin solution was for counterstaining. The results were captured by Zeiss Axioskop-2 microscope.

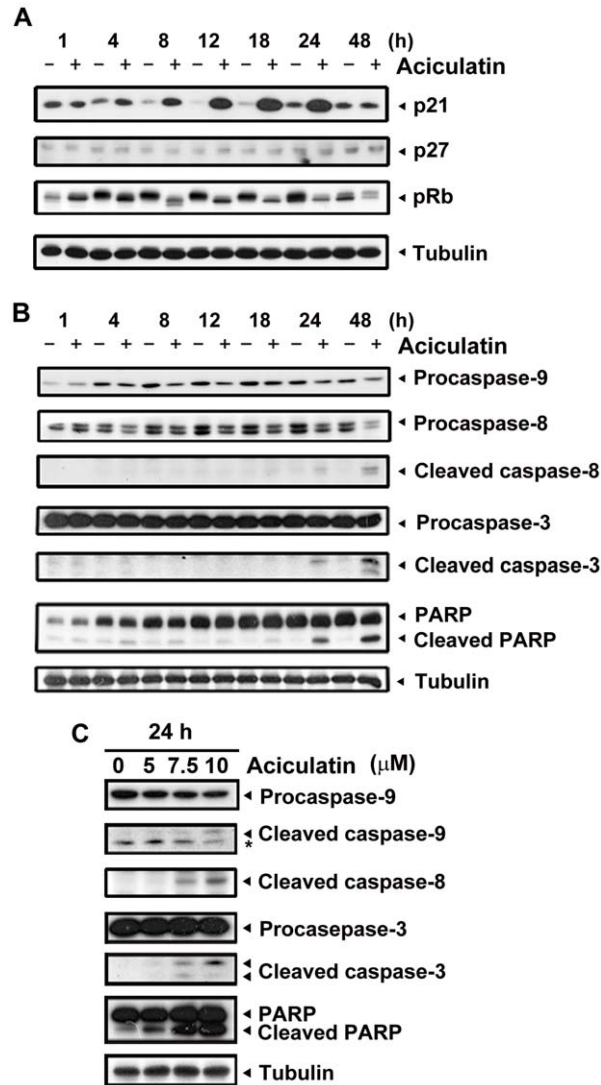

**Figure 2. Effect of aciculin on G0/G1-related proteins and apoptotic factors in HCT116 cells.** A, HCT116 cells were treated with aciculin (10  $\mu$ M) for the indicated periods and then harvested for detection of G0/G1 arrest-related proteins (p21, pRb, and p27) by immunoblotting. B, HCT116 cells were treated with aciculin (10  $\mu$ M) for the indicated periods and then harvested for detection of caspase activation and PARP cleavage. C, HCT116 cells were treated with various concentrations of aciculin (5, 7.5 and 10  $\mu$ M) for 24 h. After aciculin treatment, apoptotic proteins were detected for each treatment concentrations. The star marks a non-specific band. doi:10.1371/journal.pone.0042192.g002

**Tumor xenograft models**

Male severe combined immunodeficient (SCID) mice were implanted s.c. with HCT116 tumor cells. When the tumors reached the average volume of 90 mm<sup>3</sup>, the mice were divided into two groups ( $n = 5$ ) and the agent treatment was initiated. Vehicle (Cremophor EL/ethanol, 1:1; 0.2 mL/mouse) or aciculin (30 mg/kg) were administered intraperitoneally (i.p.) for five times each week. The length ( $L$ ) and width ( $W$ ) of the tumor were measured every 3 to 4 days, and the tumor volume was calculated as  $LW^2/2$ . The protocols of the *in vivo* study were approved by the Animal Care and Use Committee at National Taiwan University.

**Statistical analysis**

Data were expressed as mean  $\pm$  SEM of the indicated number for separate experiments. Statistical analysis of data was performed with one-way ANOVA followed by the  $t$  test, and  $p < 0.05$  were considered significant.

**Results**

**Aciculin induces G0/G1 arrest and subsequent apoptotic cell death in human cancer cells**

Aciculin is a novel C-glycoside flavonoid derived from *C. aciculatus* extract (Figure 1A). The tight carbon-carbon bond makes a C-glycoside more stable than an O-glycoside in the acidic environment or the presence of glycosidases *in vitro* and *in vivo*. We used a sulforhodamine B assay (SRB) to demonstrate that aciculin caused growth inhibition, not only in the HCT116 human colorectal cancer cell line ( $GI_{50} = 2.81 \mu$ M) but also in other cancer cell lines (Table S1). The cytotoxicity of aciculin in HCT116 cells was determined by mitochondrial 3-(4,5-dimethylthiazol-2-yl)-2,5-diphenyltetrazolium (MTT) bromide reduction assay with an  $IC_{50}$  of 5.88  $\mu$ M (Figure 1B). To determine the cell cycle distribution, synchronized cells were treated with aciculin and analyzed with FACScan flow cytometry and propidium iodide (PI) staining. The results showed that aciculin can induce G0/G1 arrest and subsequent accumulation of sub-G1 phase cells in a time-dependent manner. The increased G1 proportions after treatment at the indicated time points are shown in the curve chart (Figure 1C). We next investigated the induction of apoptosis by aciculin using TUNEL assay. Figure 1D shows that DNA fragmentation increased after 24 h of 7.5  $\mu$ M aciculin treatment. The percentages of TUNEL positive cells in this assay were calculated and quantification data was shown. These data indicate that aciculin can significantly induce apoptosis in HCT116 cells.

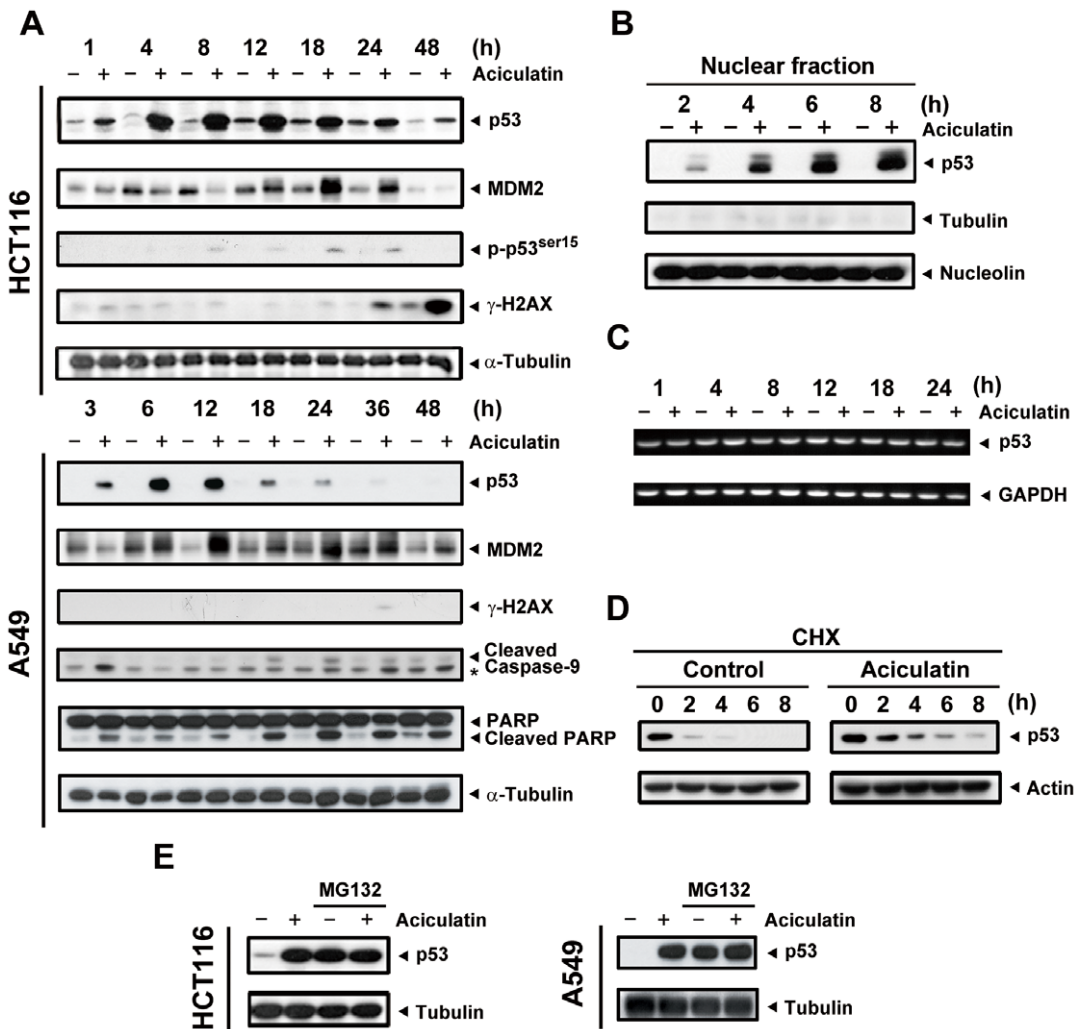

**Figure 3. Accumulation of p53 is observed following aciculin treatment in HCT116 and A549 cells via a proteasome degradation pathway.** A, HCT116 and A549 cells were treated with aciculin (10 μM) for the indicated periods and then harvested for detection of p53-related proteins. The levels of p53, phospho-ser15-p53, γ-H2AX, and the p53 downstream target MDM2 were then determined in HCT116 cells. The levels of p53, MDM2, γ-H2AX, cleaved caspase-9 and PARP were determined in A549 cells. The star marks a non-specific band. B, Nuclear extraction of HCT116 cells was performed after aciculin treatment at the indicated time points. Aciculin-induced nuclear accumulation of p53 was shown to be time-dependent. C, HCT116 cells were treated with aciculin (10 μM) at different time points followed by extraction of total RNA. The p53 mRNA was co-amplified with GAPDH. D, HCT116 cells were pretreated with aciculin (10 μM) for 3 h, followed by treatment with cycloheximide (20 μg/ml) with or without aciculin (10 μM) for the indicated periods. E, HCT116 and A549 cells were co-treated with 10 μM MG132 and 10 μM aciculin for 6 h and then harvested for p53 detection by immunoblotting. doi:10.1371/journal.pone.0042192.g003

**Aciculin induces cell cycle arrest and apoptosis through up-regulation of p21<sup>WAF1/CIP1</sup> and induction of caspase activity**

We next examined the effect of aciculin on G0/G1 arrest cell cycle regulatory proteins. The cyclin-dependent kinase inhibitors p21 and p27 are crucial regulators of G0/G1 arrest. As shown in Figure 2A, p21 was significantly upregulated and retinoblastoma protein (Rb) was dephosphorylated without any apparent change in p27 after 4 h of aciculin treatment. Both intrinsic (caspase-9) and extrinsic (caspase-8) apoptotic pathways were detected after 8 h of treatment, and the downstream apoptotic effector caspase-3 was also activated (Figure 2B). Concentration-dependent increase in apoptosis was also identified 24 h after aciculin treatment (Figure 2C). These results demonstrate that aciculin treatment can trigger HCT116 cell cycle arrest at the G0/G1 phase and subsequently induce apoptosis.

**Aciculin increased the expression of the p53 protein and its downstream effectors via a proteasome-mediated degradation pathway**

The phenomena our prior data revealed are believed to be associated with the tumor suppressor protein p53. Thus, the expression of p53 was examined at a series of time points. As shown in Figure 3A, aciculin significantly induced p53 expression in a time-dependent manner. The p53 downstream product MDM2, which is also a major regulator of ubiquitin-mediated p53 degradation, was found to be upregulated following the accumulation of p53. Interestingly, there was a decrease in MDM2 during the first few hours of aciculin treatment. We then confirmed the correlation between aciculin and DNA damage. Our data indicate that aciculin only slightly increased phospho-ser15-p53, which is the downstream effect of DNA damage. The DNA double-strand break marker phosphorylated histone 2AX (γ-



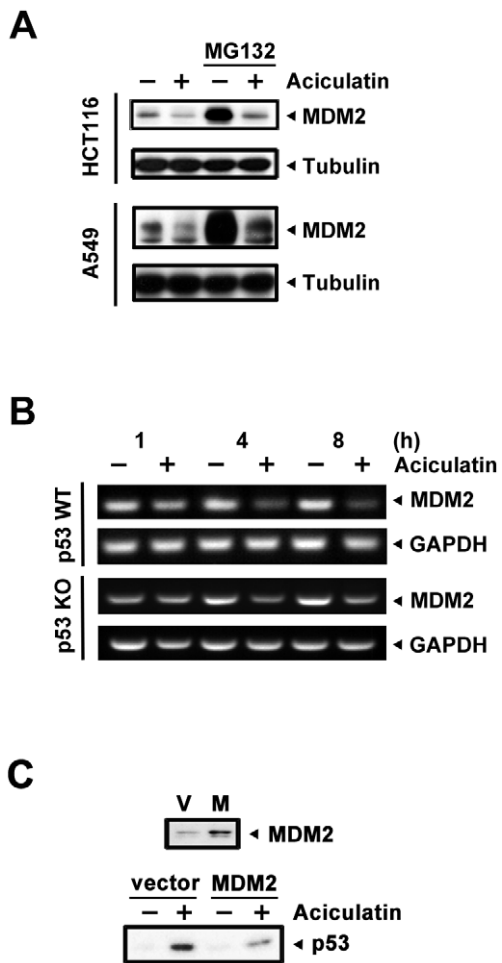

**Figure 4. Aciculin treatment attenuates MDM2 mRNA, contributing to p53 accumulation.** A, HCT116 and A549 cells were co-treated with 10  $\mu$ M MG132 and 10  $\mu$ M aciculin for 6 h (HCT116) and 3 h (A549) then harvested for detection of MDM2 by immunoblotting. B, HCT116 and p53-KO HCT116 cells were treated with aciculin (10  $\mu$ M) at different time points followed by extraction of total RNA. The MDM2 mRNA was co-amplified with GAPDH. C, The MDM2 plasmid was introduced into the HCT116 cells to induce over-expression of the MDM2 protein; the cells were then treated with aciculin for 3 h. Protein levels of p53 and MDM2 were detected by western blotting.  
doi:10.1371/journal.pone.0042192.g004

H2AX) appeared until the later stages of aciculin treatment. In addition, to check DNA single and double strand breaks, single-cell gel electrophoresis assay (COMET assay) was performed. The results showed that there is no obvious DNA damage after 6 h treatment of 10  $\mu$ M aciculin with a novel DNA damage agent QS-ZYX-1-61 (published by our group previously) as the positive control [17]. (Figure S1). These results indicate that DNA damage is not an obvious early effect of aciculin treatment. We then verified this p53-dependent effect in another p53 wild type cancer cells A549. Aciculin also triggered p53 accumulation, early MDM2 depletion (3 h) and the subsequent apoptosis pathway including cleaved caspase-9 and cleaved PARP in A549. To investigate the protein level of transcription factor p53 accumulated in nucleus by aciculin, the nuclear fractions were extracted and analyzed. Figure 3B shows that p53 was increased in nucleus in a time-dependent manner after aciculin treatment. To determine the mechanism of aciculin-induced p53 accumula-

tion, we first determined the mRNA level of p53. Figure 3C shows that there was no prominent change in p53 mRNA level. In normal circumstances, p53 protein has a very short half-life (approximately 15–30 min) due to rapid proteasome degradation. Therefore, we determined whether aciculin increases half-life of p53. When cycloheximide was used to inhibit protein biosynthesis, we observed that aciculin-induced p53 was stabilized and had a longer half-life (Figure 3D). Furthermore, we introduced the proteasome inhibitor MG132 to block the degradation pathway. Figure 3E shows that the protein level of p53 was not increased by aciculin treatment after MG132 pre-treatment in HCT116 and A549 cells. These results demonstrated that the proteasome-mediated degradation pathway is important for aciculin-induced p53 accumulation.

**Aciculin decreases MDM2 at a transcriptional level, which is critical for p53 accumulation**

In our previous study, no obvious DNA damage signals have been found. This may imply that this pathway is not the only mechanism contributing to p53 accumulation. MDM2 mediates p53 ubiquitination, leading to proteasomal degradation of p53. MDM2 also controls its own degradation by auto-ubiquitylation [18]. In this study, MDM2 depletion was found in the early stages of aciculin treatment (Figure 3A). Thus, we next evaluated the mechanism of MDM2 ablation to determine whether this decrement was involved in aciculin-induced p53 accumulation. After co-treatment with aciculin and MG132, a proteasome inhibitor, the MDM2 protein level still declined remarkably in HCT116 and A549 cells (Figure 4A). These results indicate that other proteasome-independent regulatory pathways are active. We then examined the mRNA level and found that MDM2 mRNA started to decrease after 1 h of aciculin treatment. Same result can be achieved in p53-KO HCT116, suggesting that aciculin induced MDM2 depletion is not a p53-related effect (Figure 4B). To identify the importance of MDM2 in p53 accumulation, we investigated aciculin-induced p53 accumulation after over-expressing MDM2 in HCT116 cells. Following aciculin treatment, over-expression of MDM2 reversed the p53 level (Figure 4C). Collectively, these results indicate that aciculin can induce accumulation of p53 through MDM2 mRNA depletion.

**Role of p53 in aciculin-mediated cell cycle arrest and apoptosis**

Next, we aimed to identify the role of p53 in aciculin-induced HCT116 cell cycle arrest and apoptosis. First, we compared the cytotoxicity of aciculin in a HCT116 p53-WT (wild-type) and p53-KO (knockout) system. As shown in Figure 5A, we found a significant difference in the IC<sub>50</sub> between these 2 cell lines; the WT cells (IC<sub>50</sub> value, 5.88  $\mu$ M) were more sensitive to aciculin than the p53-KO cells (IC<sub>50</sub> value, 9.13  $\mu$ M). Furthermore, the proportion of aciculin-induced G0/G1 arrest in the WT cells was about 3-fold higher than that in the p53-KO cells after 18 h of aciculin treatment (Figure 5B). We then used western blotting to examine p53 and apoptotic proteins in p53-WT and p53-KO HCT116 cells during aciculin treatment. Figure 5C shows that the p53-KO cells expressed lower levels of caspase-3 and cleaved poly (ADP-ribose) polymerase (PARP). The induction of sub-G1 was also examined after aciculin treatment and results indicate that p53-KO cells were more resistant to aciculin-induced sub-G1 increment (lower bar chart). The p53 direct transcriptional targets, p21 and PUMA (p53 upregulated modulator of apoptosis) are related to growth arrest and apoptosis. Both of them were

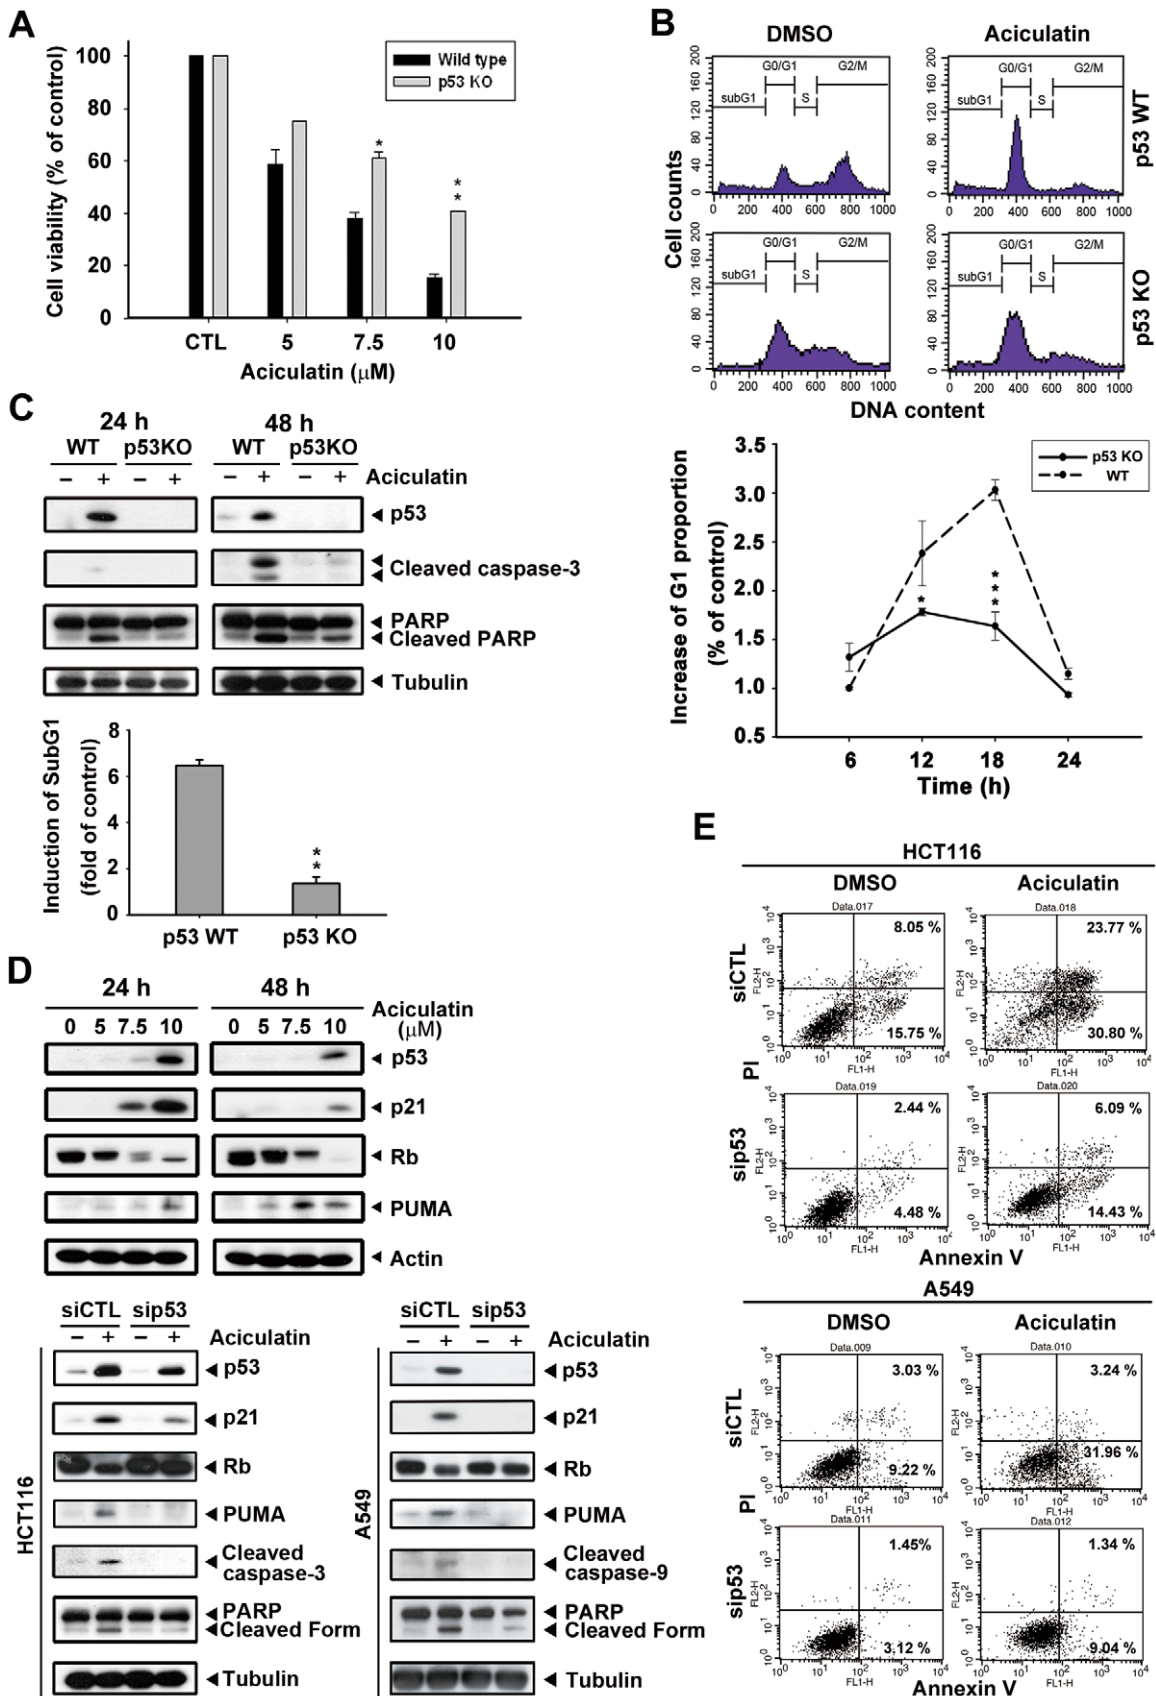

**Figure 5. p53 is required for aciculin to trigger cell cycle arrest and apoptosis.** A, p53-KO HCT116 cells were incubated with aciculin (5–10 μM) for 48 h. Cell viability was then determined by MTT assay. The results were compared with wild-type HCT116 cells. Mean ± SE from 3 independent experiments. \**P*<0.05 and \*\**P*<0.01. B, p53-KO HCT116 cells were starved overnight and then incubated with vehicle (0.1% DMSO) or

aciculin (10  $\mu$ M) for different periods. The DNA proportion was subsequently analyzed by PI staining. The cell cycles of p53-WT and p53-KO HCT116 cells after treatment of 18 h are shown. The G1 proportions of both cell lines were compared. Mean  $\pm$  SE values from 3 independent experiments.  $*P<0.05$  and  $***P<0.001$ . C, p53-WT and p53-KO HCT116 cells were incubated with aciculin (10  $\mu$ M) for 24 h and 48 h and then harvested for detection of p53, caspase activation, and cleavage of PARP (upper). p53-WT and p53-KO cells were treated with vehicle (0.1% DMSO) or aciculin (10  $\mu$ M) for 24 h and were subsequently analyzed by PI staining. The induction of sub-G1 phase of each group was determined (lower bar chart).  $***P<0.005$ . D, HCT116 cells were treated with various concentrations of aciculin (5, 7.5, and 10  $\mu$ M). After 24 h and 48 h aciculin treatment, The levels of p53, p21, pRb and PUMA were then determined (upper). p53 siRNA was used to knock down the p53 level of HCT116 and A549 cells, which were then treated with aciculin for 24 h. The cells were harvested for detection of p53 and apoptotic related proteins (lower). E, p53 knock-down HCT116 and A549 cells were treated with aciculin (10  $\mu$ M) for 40 h and then double stained with annexin V-FITC and PI. The percentages of fluorescently labeled cells were determined by flow cytometry.  
doi:10.1371/journal.pone.0042192.g005

upregulated after 24 h and 48 h of aciculin treatment in a concentration-dependent manner. (Figure 5D). Figure 5D also shows knockdown of the p53 protein level by siRNA in p53 wild-type cells HCT116 and A549; this resulted in significant inhibition of p53 expression after aciculin treatment, an effect that lasted for up to 24 h. This p53 depletion led to abrogation of aciculin-induced p21 and dephosphorylation of Rb; also the apoptotic proteins PUMA, caspase-9, caspase-3 and PARP. After cells were double stained with annexin V-FITC and PI for apoptosis and necrosis, the results revealed that p53 knock-down HCT116 and A549 cells were both more resistant to aciculin induced apoptosis than wild-type cells (Figure 5E). Based on these data, we suggest that p53 is a pivotal mediator of aciculin-induced apoptosis.

### Aciculin inhibited HCT116 tumor cell growth in the mouse xenograft models

To examine the *in vivo* anti-cancer activity of aciculin, we established HCT116-derived xenograft models in severe combined immunodeficient (SCID) mice. Both control and treated mice were sacrificed, and the HCT116-xenografted tumor tissues were examined. As shown in Figure 6A, our results demonstrated that intraperitoneal administration of aciculin (30 mg/kg) once daily significantly inhibited tumor growth from day 8, without any loss of body weight; this suggests that there was no obvious cytotoxicity *in vivo*. We also stained the HCT116-xenografted tumor tissues with Hematoxylin and Eosin (Figure 6B–a, b), p53 antibody (Figure 6B–c, d) and Ki-67 (Figure 6B–e, f). The results revealed that treatment with aciculin significantly increased p53 expression and the cell proliferation marker Ki67. These observation correlates with the *in vitro* studies. The tumor tissue slices were also stained with TUNEL reagent and the results indicates that aciculin-treated tumor did undergo apoptosis (Figure 6C).

### Discussion

The tumor suppressor protein p53 has been a promising target of anti-cancer therapy for decades. It plays an essential role in cell cycle regulation and apoptosis. Here, we demonstrated that aciculin is a compelling p53 inducer and also activates the downstream effectors of p53. p21, a well-known transcriptional target of p53, is the major regulator of the G0/G1 cell cycle phase. As shown in Figure 2A and 5D, p21 expression was increased and pRb was hypophosphorylated after aciculin treatment. p21 has previously been shown to bind to Cdk/cyclin complexes, inducing hypophosphorylated pRb to sequester E2F gene promoter region binding factor 1 (E2F-1), thereby inhibiting the ability of E2F-1 to carry out the cell cycle [19]. Some studies have indicated that HCT116 cells are prone to remain in G0/G1 phase rather than undergo apoptosis with p53 induction [20,21]. In this situation, p21 induction is regarded as protection and mediates cell cycle arrest to suppress apoptosis [5]. However, a high percentage of HCT116 cells do undergo apoptosis after G0/G1 arrest, as was

shown here with the aciculin-treated cells. Furthermore, a recent study suggested that p21 induced by nongenotoxic p53 activation, unlike stress-induced p53 activation, does not affect the apoptotic response [22], which could explain the role of p21 induced by nongenotoxic aciculin. Another p53 downstream target, PUMA, was also upregulated after aciculin treatment (Figure 5D). PUMA is a potent pro-apoptotic factor and has been reported to mediate p53-dependent apoptosis [20,23]. These results indicate that the aciculin-induced p53 pathway is growth inhibitory and cytotoxic in HCT116 cells.

Aciculin is a C-glycosidic flavonoid with more indestructible structure than O-glycosidic flavonoids. Several flavonoids such as wogonin, apigenin, luteolin, and quercetin have been documented to induce p53 activity [23,24]. Here, aciculin induced accumulation of p53 by inhibiting proteasome-dependent degradation at lower concentrations compared to other flavonoids (Figure 3C–E). It has been reported that p53 degradation is decreased in response to cellular stresses, especially DNA damage [8]. Recently, flavonoid interactions with DNA and RNA have been studied [25], and aciculin has been documented to have DNA-binding ability [2]. Therefore, we checked for DNA damage after aciculin treatment of HCT116 cells. However, no significant DNA damage was observed in the aciculin-treated HCT116 cells. The histone H2AX is immediately phosphorylated to  $\gamma$ -H2AX when there is a DNA double-strand break in chromatin [26]. In this study,  $\gamma$ -H2AX did not appear until 24 h after aciculin treatment, and this delayed effect was more likely a consequence of apoptosis. The COMET assay also proved no significant DNA breaks in early stage of aciculin treatment. But our western blotting results still revealed faint upregulation of phospho-ser15-p53, which correlates with DNA damage and may contribute to the transcriptional activity of p53. Collectively, these results suggest that aciculin is a DNA-binding agent, but one that does not induce significant DNA damage. Mechanisms other than genomic damage could be responsible for the p53 upregulation and anti-cancer activity of aciculin.

Therapeutic agents that can activate the p53 pathway without genotoxicity are potentially safer agents to use in cancer therapy [7,27]. This concept has already been considered in the development of drugs targeting the p53-MDM2 interaction. In this study, the ability of aciculin to ablate MDM2 mRNA was noted (Figure 4B). Although the abrogation of MDM2 mRNA by some natural products, including genistein and gambogic acid, has been reported [28,29], to our knowledge this is the first time to prove that overexpressed MDM2 could partially reverse the flavonoid-induced p53 accumulation in HCT116 cells. Phosphorylation of p53 (Figure 3A) could interrupt the p53-MDM2 interaction; this may result in the residual p53 level when MDM2 over-expression (Figure 4C). The contradictory observation that p53 stability is not responsive to changes in endogenous MDM2 level has also been reported [30]. However, we demonstrated that the depletion of MDM2 dose plays an



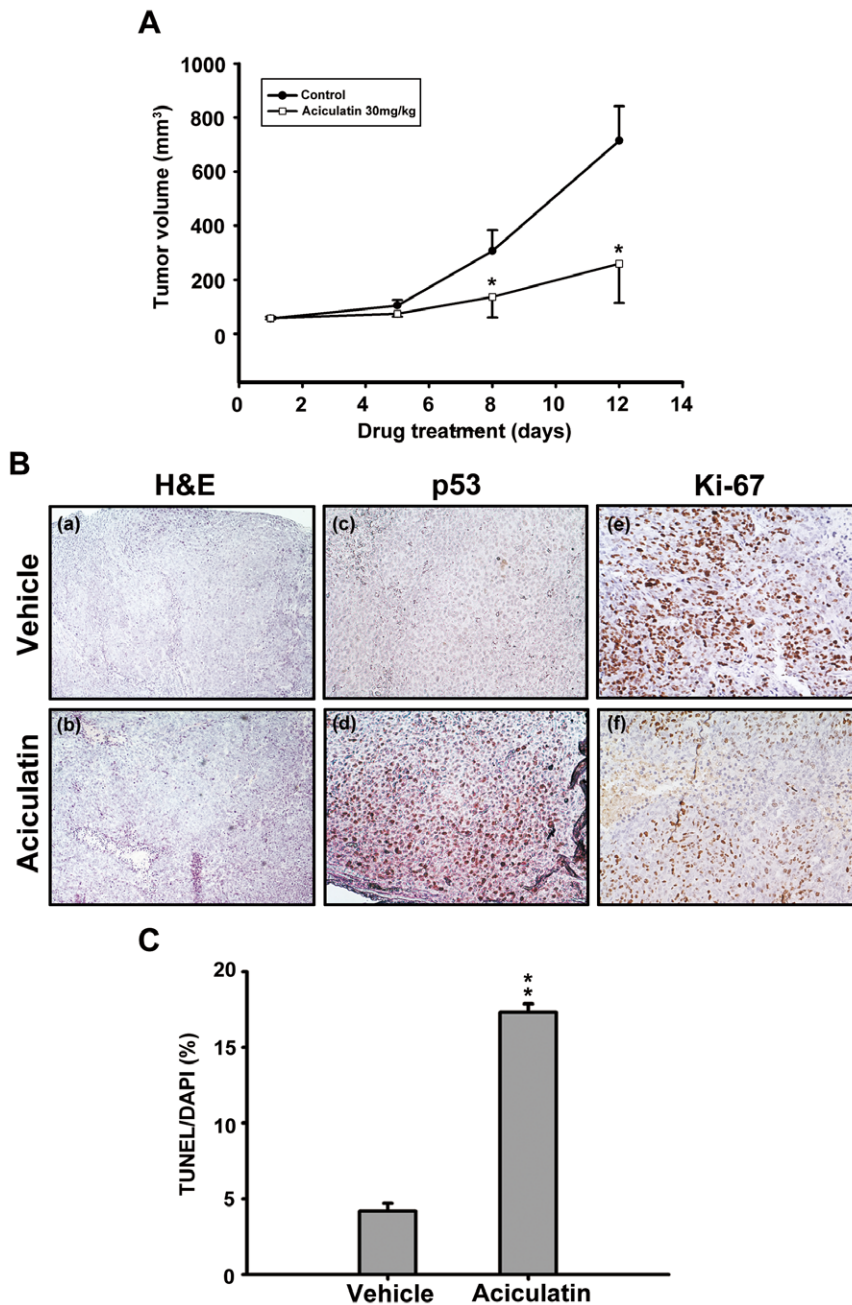

**Figure 6. Aciculin anti-cancer activity in the HCT116 xenograft models.** HCT116 cells were injected subcutaneously into the flanks of severe combined immunodeficient mice. The mice were divided into two groups ( $n=5$ ) and when the tumors reached the average volume ( $90 \text{ mm}^3$ ) the treatment was initiated. The mice were sacrificed on day 12 thereafter. A, The curves show the mean ( $\pm$ SE) tumor sizes measured within each group. The differences in tumor size between the control and treated mice were statistically significant ( $*P<0.05$ ). Bodyweight was measured every day from day 1 of administration. There were no significant differences after treatment in any of the groups (data not shown). B, Treated and untreated tumor slices were assessed by H&E (a, b) and IHC staining for p53 protein (c, d) and Ki-67 protein (e, f). Tumor samples were observed under  $100\times$  (for H&E) and  $200\times$  (for IHC) magnification. C, The tumor tissue slices were assessed by TUNEL assay kit and the bar charts indicates the fold change of sub-G1 phase.  $**P<0.01$ . doi:10.1371/journal.pone.0042192.g006

important role in aciculin-induced p53 stabilization in HCT116 cells.

We also found that aciculin can still trigger cell death in p53-KO HCT116 and HT-29 (with mutant p53) (Table S1) cells via a p53-independent mechanism. Moreover, we proved that aciculin could also deplete the MDM2 mRNA level of p53-KO HCT116 cells (Fig. 4B), which may contribute to the p53-

independent cell death. Several studies have indicated that MDM2 interacts not only with p53 but also with other pivotal proteins such as p73 and p21 in tumor cells without wild-type p53 [31,32,33]. Thus, these MDM2 related effects may contribute to p53-independent cell death.

As demonstrated in our *in vivo* xenograft models, aciculin effectively inhibited HCT116 tumor progression with no obvious

toxicity (Figure 6A). This finding supports the contention that aciculatin does exhibit anti-tumor activity in living organisms. Immunohistochemical (IHC) staining showed that the p53 protein was upregulated in aciculatin-treated tumor tissues. This proved the importance of p53 *in vivo* (Figure 6B).

In conclusion, these results show that aciculatin is a potent p53 inducer and potent anti-tumor flavonoid with low genotoxicity. This study also provides insights into the relationship between MDM2 depletion and p53 accumulation. An interesting question that remains to be answered is whether there is any correlation between these promising effects and DNA-binding activity. If so, the integrity of the aciculatin structure becomes important, and the uncommon tight C-glycoside linkage could conserve the compound, rendering it indestructible in the cellular environment. We believe that aciculatin is a promising anti-cancer agent and that further aciculatin-related effects should be elucidated in future.

## References

- Krause JA, Eggleston DS (1991) Structure of  $\beta$ -2,6-Dideoxy-Beta-Ribo-Hexopyranosyl-5-Hydroxy-2-(4-Hydroxyphenyl)-7-Methoxy-4h-1-Benzopyran-4-One Sesquihydrate, Aciculatin. Acta Crystallographica Section C-Crystal Structure Communications 47: 2595–2598.
- Carte BK, Carr S, Debrosse C, Hemling ME, Mackenzie L, et al. (1991) Aciculatin, a Novel Flavone-C-Glycoside with DNA-Binding Activity from *Chrysopogon-Aciculatis*. Tetrahedron 47: 1815–1822.
- Hsieh IN, Chang AS, Teng CM, Chen CC, Yang CR (2011) Aciculatin inhibits lipopolysaccharide-mediated inducible nitric oxide synthase and cyclooxygenase-2 expression via suppressing NF- $\kappa$ B and JNK/p38 MAPK activation pathways. J Biomed Sci 18: 28.
- Piette J, Neel H, Marechal V (1997) Mdm2: keeping p53 under control. Oncogene 15: 1001–1010.
- Vousden KH, Lane DP (2007) p53 in health and disease. Nat Rev Mol Cell Biol 8: 275–283.
- Lain S, Lane D (2003) Improving cancer therapy by non-genotoxic activation of p53. European Journal of Cancer 39: 1053–1060.
- Cheok CF, Verma CS, Baselga J, Lane DP (2011) Translating p53 into the clinic. Nat Rev Clin Oncol 8: 25–37.
- Vazquez A, Bond EE, Levine AJ, Bond GL (2008) The genetics of the p53 pathway, apoptosis and cancer therapy. Nat Rev Drug Discov 7: 979–987.
- Oliner JD, Kinzler KW, Meltzer PS, George DL, Vogelstein B (1992) Amplification of a gene encoding a p53-associated protein in human sarcomas. Nature 358: 80–83.
- Jim Y, Lee H, Zeng SX, Dai MS, Lu H (2003) MDM2 promotes p21/waf1/cip1 proteasomal turnover independently of ubiquitination. EMBO J 22: 6365–6377.
- Xiao ZX, Chen JD, Levine AJ, Modjtahedi N, Xing J, et al. (1995) Interaction between the Retinoblastoma Protein and the Oncoprotein Mdm2. Nature 375: 694–698.
- Zeng XY, Chen LH, Jost CA, Maya R, Keller D, et al. (1999) MDM2 suppresses p73 function without promoting p73 degradation. Molecular and Cellular Biology 19: 3257–3266.
- Boyd MT, Vlatkovic N, Haines DS (2000) A novel cellular protein (MTBP) binds to MDM2 and induces a G(1) arrest that is suppressed by MDM2. Journal of Biological Chemistry 275: 31883–31890.
- Zhang Z, Wang H, Li M, Rayburn ER, Agrawal S, et al. (2005) Stabilization of E2F1 protein by MDM2 through the E2F1 ubiquitination pathway. Oncogene 24: 7238–7247.
- Chen TH, Pan SL, Guh JH, Liao CH, Huang DY, et al. (2008) Moscatilin induces apoptosis in human colorectal cancer cells: a crucial role of c-Jun NH2-terminal protein kinase activation caused by tubulin depolymerization and DNA damage. Clin Cancer Res 14: 4250–4258.
- Chang LH, Chen CH, Huang DY, Pai HC, Pan SL, et al. (2010) Thrombin induces expression of twist and cell motility via the hypoxia-inducible factor-1 $\alpha$  transcriptional pathway in colorectal cancer cells. J Cell Physiol 126: 1060–1068.
- Chen MC, Pan SL, Shi Q, Xiao Z, Lee KH, et al. (2011) QS-ZYX-1-61 induces apoptosis through topoisomerase II in human non-small-cell lung cancer A549 cells. Cancer Sci.
- Stad R, Little NA, Xirodimas DP, Frenk R, van der Eb AJ, et al. (2001) Mdmx stabilizes p53 and Mdm2 via two distinct mechanisms. EMBO Rep 2: 1029–1034.
- Vidal A, Koff A (2000) Cell-cycle inhibitors: three families united by a common cause. Gene 247: 1–15.
- Thakur VS, Ruhul Amin AR, Paul RK, Gupta K, Hastak K, et al. (2010) p53-Dependent p21-mediated growth arrest pre-empts and protects HCT116 cells from PUMA-mediated apoptosis induced by EGCG. Cancer Lett 296: 225–232.
- Cheok CF, Kua N, Kaldis P, Lane DP (2010) Combination of nutlin-3 and VX-680 selectively targets p53 mutant cells with reversible effects on cells expressing wild-type p53. Cell Death Differ 17: 1486–1500.
- Xia M, Knezevic D, Vassilev LT (2011) p21 does not protect cancer cells from apoptosis induced by nongenotoxic p53 activation. Oncogene 30: 346–355.
- Lee DH, Kim C, Zhang L, Lee YJ (2008) Role of p53, PUMA, and Bax in wogonin-induced apoptosis in human cancer cells. Biochem Pharmacol 75: 2020–2033.
- Plaumann B, Fritsche M, Rimpler H, Brandner G, Hess RD (1996) Flavonoids activate wild-type p53. Oncogene 13: 1605–1614.
- Kanakis CD, Tarantilis PA, Polissiou MG, Diamantoglou S, Tajmir-Riahi HA (2007) An overview of DNA and RNA bindings to antioxidant flavonoids. Cell Biochem Biophys 49: 29–36.
- Celeste A, Fernandez-Capetillo O, Kruhlak MJ, Pilch DR, Staudt DW, et al. (2003) Histone H2AX phosphorylation is dispensable for the initial recognition of DNA breaks. Nat Cell Biol 5: 675–679.
- Chene P (2003) Inhibiting the p53-MDM2 interaction: an important target for cancer therapy. Nat Rev Cancer 3: 102–109.
- Gu H, Wang X, Rao S, Wang J, Zhao J, et al. (2008) Gambogic acid mediates apoptosis as a p53 inducer through down-regulation of mdm2 in wild-type p53-expressing cancer cells. Mol Cancer Ther 7: 3298–3305.
- Li M, Zhang Z, Hill DL, Chen X, Wang H, et al. (2005) Genistein, a dietary isoflavone, down-regulates the MDM2 oncogene at both transcriptional and posttranslational levels. Cancer Res 65: 8200–8208.
- Kaester MD, Pebernard S, Iggo RD (2004) Regulation of p53 stability and function in HCT116 colon cancer cells. J Biol Chem 279: 7598–7605.
- Lau LM, Nugent JK, Zhao X, Irwin MS (2008) HDM2 antagonist Nutlin-3 disrupts p73-HDM2 binding and enhances p73 function. Oncogene 27: 997–1003.
- Kravchenko JE, Ilyinskaya GV, Komarov PG, Agapova LS, Kochetkov DV, et al. (2008) Small-molecule RETRA suppresses mutant p53-bearing cancer cells through a p73-dependent salvage pathway. Proc Natl Acad Sci U S A 105: 6302–6307.
- Rong JJ, Hu R, Qi Q, Gu HY, Zhao Q, et al. (2009) Gambogic acid down-regulates MDM2 oncogene and induces p21(Waf1/CIP1) expression independent of p53. Cancer Letters 284: 102–112.

## Supporting Information

**Figure S1** HCT116 cells were treated with 10  $\mu$ M aciculatin for 6 h or 3  $\mu$ M QS-ZYX-1-61 for 1 h as a positive control. After treatments, the single cell gel electrophoresis assay (comet assay) was performed to detect the DNA strand breaks. Damaged cell is indicated by arrow. The percentages of tailing cells were calculated in 3 different areas each group (\*\* $P < 0.01$ ). (PDF)

**Table S1** Various types of cancer cell lines were treated with aciculatin. Cell growth inhibitory activity (GI<sub>50</sub>) was determined by the SRB assay. (PDF)

## Author Contributions

Conceived and designed the experiments: CYL SLP CMT ACT MCC. Performed the experiments: CYL ACT MCC. Analyzed the data: CYL SLP CMT LHC HLS. Contributed reagents/materials/analysis tools: CCC YLC LHC HLS CYL. Wrote the paper: SLP CMT CYL.
